# Supplementary material for: Phylogenetic context of Shiga toxin-producing Escherichia coli serotype O26:H11 in England
Source: PubMed Central journal article supplement (PMC8627664; doi:10.1099/mgen.0.000551), 2021-03-24
Supplement: mgen-7-0551-s001.pdf [file mgen-7-0551-s001.pdf]

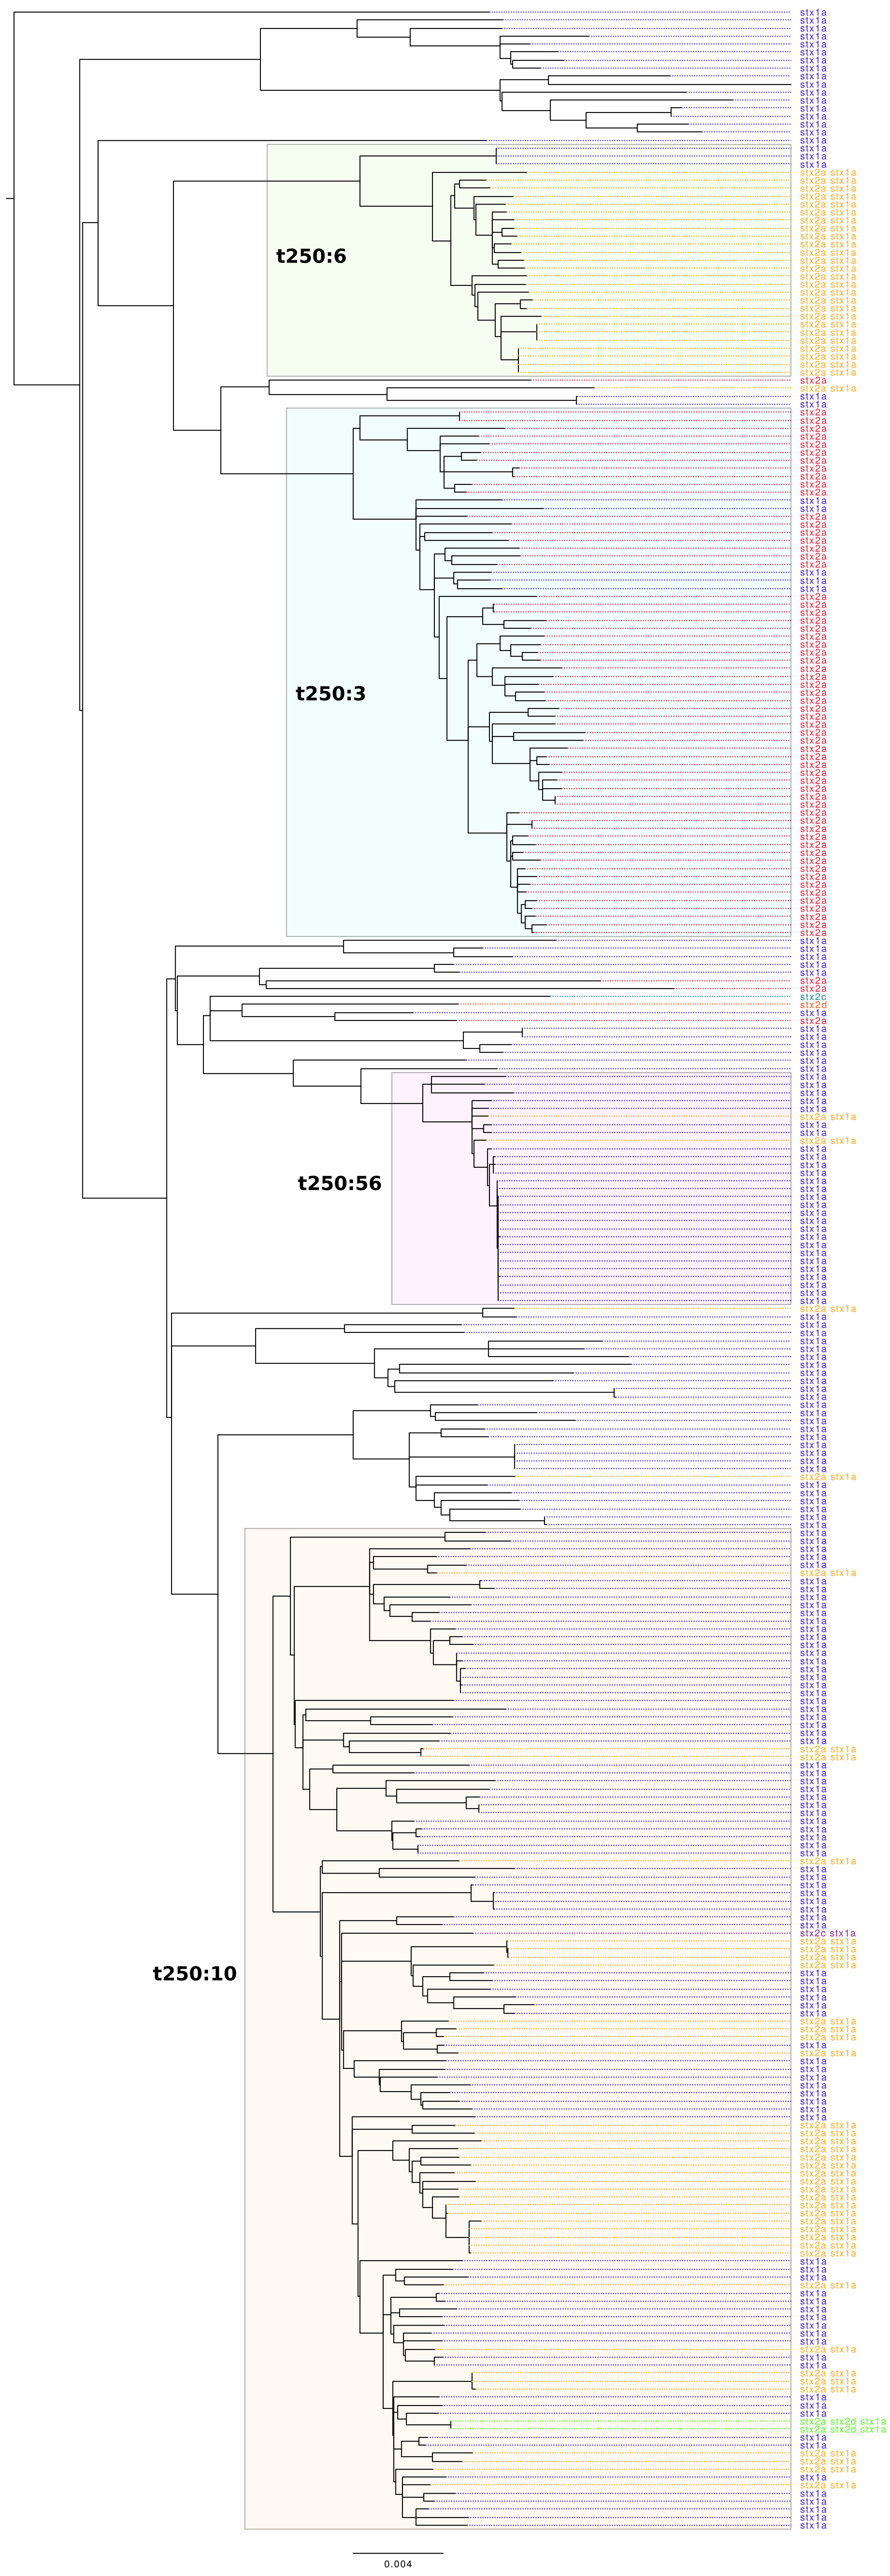

t250:6

t250:3

t250:56

t250:10

0.004
